# Supplementary material for: Assessing thermodynamic parameter sensitivity for simulating temperature responses of soil nitrification
Source: Royal Society of Chemistry journal article supplement (doi:10.1039/c9em00310j), 2019-01-01
Supplement: c9em00310j1.pdf [file c9em00310j1.pdf]

## Assessing Thermodynamic Parameter Sensitivity for Simulating Temperature Response of Soil Nitrification

Hussnain Mukhtar <sup>1</sup>, Yu-Pin Lin <sup>1,2\*</sup>, Chiao-Ming Lin <sup>1</sup>, Joy R. Petway <sup>1</sup>

### Electronic supplementary information

#### Contents of this file

Tables S1 to S3

Figure S1 to S4

#### Introduction

Supplementary information contains 3 tables with basic information on edaphic properties of selected soils, unknown parameter fitting results for SQRT and MMRT models (S1) and ANOVA analysis to compare significant difference between models' performances and estimated parameter values for different temperature ranges (S2). Moreover, figure S1, S2, S3 and S4 demonstrate soil sampling sites across Taiwan, step-by-step procedure for global sensitivity analysis, scatter plot of parameter sensitivity analysis for square root growth model (SQRT) and macromolecular rate theory model (MMRT) and variation in optimum temperature ( $T_{opt}$ ) for nitrification among soils at different temperature ranges, respectively.

#### Supplementary material

**Table S1.** Edaphic properties of selected soil plots.

|                          | Land Cover Type | Description | Mean annual temperature<br>C° | pH   | TOC<br>g/kg | TN<br>g/kg |
|--------------------------|-----------------|-------------|-------------------------------|------|-------------|------------|
| Miaoli County, Taiwan    | FR1             | Forest soil | 23.12                         | 5.03 | 18.64       | 1.25       |
|                          | FR2             | Forest soil |                               | 5.63 | 12.68       | 1.24       |
|                          | FL1             | Fallow land |                               | 6.35 | 17.20       | 1.40       |
|                          | FL2             | Fallow land |                               | 6.42 | 8.83        | 0.97       |
|                          | CL2             | Cropped     |                               | 5.58 | 12.27       | 1.30       |
|                          | CL6             | Cropped     |                               | 6.45 | 14.32       | 1.47       |
| Kaohsiung County, Taiwan | FR3             | Forest soil | 25.85                         | 7.01 | 11.78       | 0.80       |
|                          | FL3             | Fallow land |                               | 6.50 | 17.40       | 3.15       |
|                          | CL1             | Cropped     |                               | 6.70 | 23.81       | 2.88       |
| Taoyuan city, Taiwan     | FL4             | Fallow land | 23.24                         | 6.2  | 12.18       | 0.97       |
|                          | FR4             | Forest soil |                               | 6.02 | 11.91       | 2.08       |
|                          | CL3             | Cropped     |                               | 6.17 | 10.04       | 1.53       |
| Pingtung city, Taiwan    | FL5             | Fallow land | 24.96                         | 6.61 | 15.08       | 1.69       |
|                          | CL5             | Cropped     |                               | 7.21 | 10.02       | 0.94       |
| Chiayi County, Taiwan    | FL6             | Fallow land | 24.22                         | 6.23 | 8.43        | 1.12       |
|                          | CL4             | Cropped     |                               | 5.65 | 13.11       | 1.80       |

TOC: Total organic carbon, TN: Total nitrogen

**Table S2.** Unknown parameters estimated by SQRT and MMRT models and their accuracy in simulating nitrification response to temperature. (FR: forest soil, FL: fallow land, CL: cropping land). Note; a variation of  $\pm 0.015$  for likelihood functions (NSE and  $r$ ) may be possible while replicating of these results since sensitive parameters such as  $T_{\max}$ ,  $\Delta S_{T_o}^{\ddagger}$  and  $a$  are rounded up from more than five decimal digits to two to three decimal digits.

| Temperature range | Land Cover Type | SQRT  |       |            |            |                  |      | MMRT     |                             |                            |                                |                  |      |          |
|-------------------|-----------------|-------|-------|------------|------------|------------------|------|----------|-----------------------------|----------------------------|--------------------------------|------------------|------|----------|
|                   |                 | $a$   | $b$   | $T_{\min}$ | $T_{\max}$ | $T_{\text{opt}}$ | NSE* | $r^{**}$ | $\Delta H_{T_o}^{\ddagger}$ | $-(\Delta C_p^{\ddagger})$ | $-(\Delta S_{T_o}^{\ddagger})$ | $T_{\text{opt}}$ | NSE* | $r^{**}$ |
|                   |                 |       |       | °C         | °C         | °C               |      |          |                             |                            |                                |                  | °C   |          |
| 4 to 40°C         | FR1             | 0.043 | 0.398 | -4.81      | 42.82      | 35.64            | 0.88 | 0.94     | 32.14                       | 5.30                       | 0.137                          | 31.50            | 0.89 | 0.95     |
|                   | FR2             | 0.051 | 0.396 | -2.96      | 42.93      | 35.83            | 0.92 | 0.97     | 45.11                       | 3.63                       | 0.093                          | 37.80            | 0.88 | 0.94     |
|                   | FR3             | 0.084 | 0.108 | -1.98      | 43.50      | 29.71            | 0.81 | 0.90     | 10.14                       | 10.89                      | 0.21                           | 26.30            | 0.85 | 0.93     |
|                   | FL1             | 0.034 | 0.574 | -2.71      | 42.10      | 36.53            | 0.95 | 0.98     | 34.84                       | 3.59                       | 0.133                          | 35.10            | 0.90 | 0.96     |
|                   | FL2             | 0.031 | 0.571 | -3.61      | 41.86      | 36.33            | 0.92 | 0.97     | 45.42                       | 6.47                       | 0.101                          | 32.40            | 0.87 | 0.94     |
|                   | FL3             | 0.032 | 0.326 | -15.37     | 41.55      | 32.82            | 0.83 | 0.91     | 7.94                        | 10.83                      | 0.225                          | 26.10            | 0.84 | 0.92     |
|                   | CL1             | 0.077 | 0.502 | -3.29      | 41.45      | 35.41            | 0.88 | 0.94     | 31.10                       | 7.87                       | 0.135                          | 29.30            | 0.88 | 0.94     |
|                   | CL2             | 0.026 | 0.649 | -4.56      | 41.88      | 36.76            | 0.93 | 0.97     | 38.15                       | 4.77                       | 0.126                          | 33.30            | 0.92 | 0.96     |
| 20 to 45°C        | FR4             | 0.108 | 0.044 | -2.99      | 51.83      | 32.76            | 0.80 | 0.92     | 52.80                       | 8.84                       | 0.066                          | 31.32            | 0.89 | 0.94     |
|                   | FL4             | 0.112 | 0.041 | -1.61      | 52.00      | 32.16            | 0.87 | 0.94     | 41.36                       | 7.54                       | 0.103                          | 30.84            | 0.93 | 0.97     |
|                   | FL5             | 0.039 | 0.035 | -2.70      | 49.09      | 29.92            | 0.84 | 0.92     | 48.66                       | 13.45                      | 0.106                          | 28.97            | 0.95 | 0.98     |
|                   | FL6             | 0.089 | 0.048 | -4.50      | 50.00      | 32.26            | 0.96 | 0.98     | 24.38                       | 7.59                       | 0.161                          | 28.56            | 0.97 | 0.99     |
|                   | CL3             | 0.038 | 0.043 | -1.36      | 50.34      | 31.18            | 0.84 | 0.92     | 44.80                       | 8.27                       | 0.112                          | 30.77            | 0.88 | 0.96     |
|                   | CL4             | 0.064 | 0.043 | -1.22      | 48.77      | 30.03            | 0.85 | 0.94     | 42.82                       | 10.16                      | 0.111                          | 29.56            | 0.94 | 0.98     |
|                   | CL5             | 0.084 | 0.048 | -1.56      | 45.60      | 28.40            | 0.91 | 0.95     | 23.70                       | 11.59                      | 0.172                          | 27.40            | 0.96 | 0.99     |
|                   | CL6             | 0.099 | 0.043 | -0.57      | 50.22      | 30.82            | 0.90 | 0.95     | 58.07                       | 10.28                      | 0.054                          | 30.99            | 0.98 | 0.99     |

Note: \* Nash-Sutcliffe Coefficient; \*\* Correlation Constant;  $T_{\min}$ : Minimum temperature;  $T_{\max}$ : Maximum temperature;  $T_{\text{opt}}$ : Optimum temperature;  $\Delta H_{T_o}^{\ddagger}$ : Change of enthalpy;  $\Delta S_{T_o}^{\ddagger}$ : Change of entropy;  $\Delta C_p^{\ddagger}$ : Change in heat capacity.

**Table S3.** ANOVA analysis to compare significant difference between models' performances and estimated parameter values for different temperature ranges (similar data for remaining parameters are not shown here).

|                                                                                                                                                                              | <i>F</i> | <i>P-value</i> |
|------------------------------------------------------------------------------------------------------------------------------------------------------------------------------|----------|----------------|
| ANOVA analysis to compare significant difference in NSE coefficient between SQRT simulated and observed NP rates over temperature ranges (4 °C to 40°C and 20 °C to 45 °C ). | 13.2036  | **             |
| ANOVA analysis to compare significant difference in NSE coefficient between MMRT simulated and observed NP rates over temperature ranges (4 °C to 40°C and 20 °C to 45 °C ). | 0.5643   | 0.4650         |
| ANOVA analysis to compare significant difference between $T_{\min}$ estimated for different temperature ranges (4 °C to 40°C and 20 °C to 45 °C ).                           | 3.19     | 0.096          |
| ANOVA analysis to compare significant difference between $T_{\max}$ estimated for different temperature ranges (4 °C to 40°C and 20 °C to 45 °C ).                           | 96.3676  | **             |
| ANOVA analysis to compare significant difference $\Delta C_p^{\ddagger}$ estimated for different temperature ranges (4 °C to 40°C and 20 °C to 45 °C ).                      | 5.7173   | *              |
| Note: *: p-value<0.05; **: p-value<0.01                                                                                                                                      |          |                |

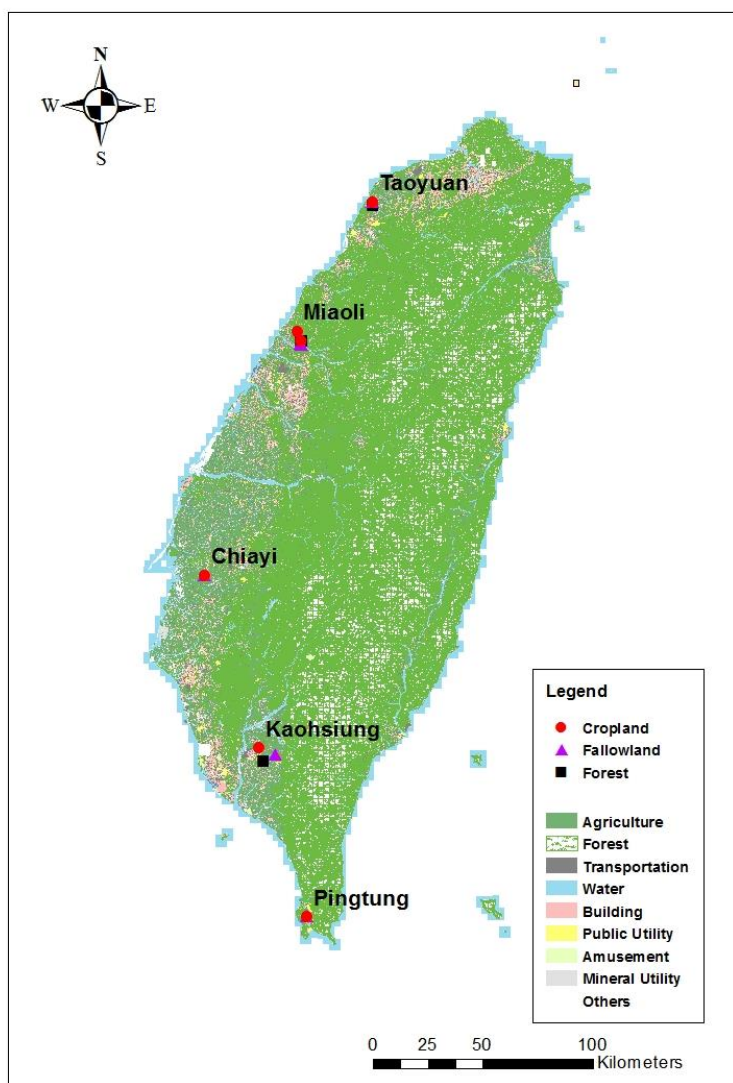

**Figure S1.** Map representing the soil sampling sites across Taiwan.

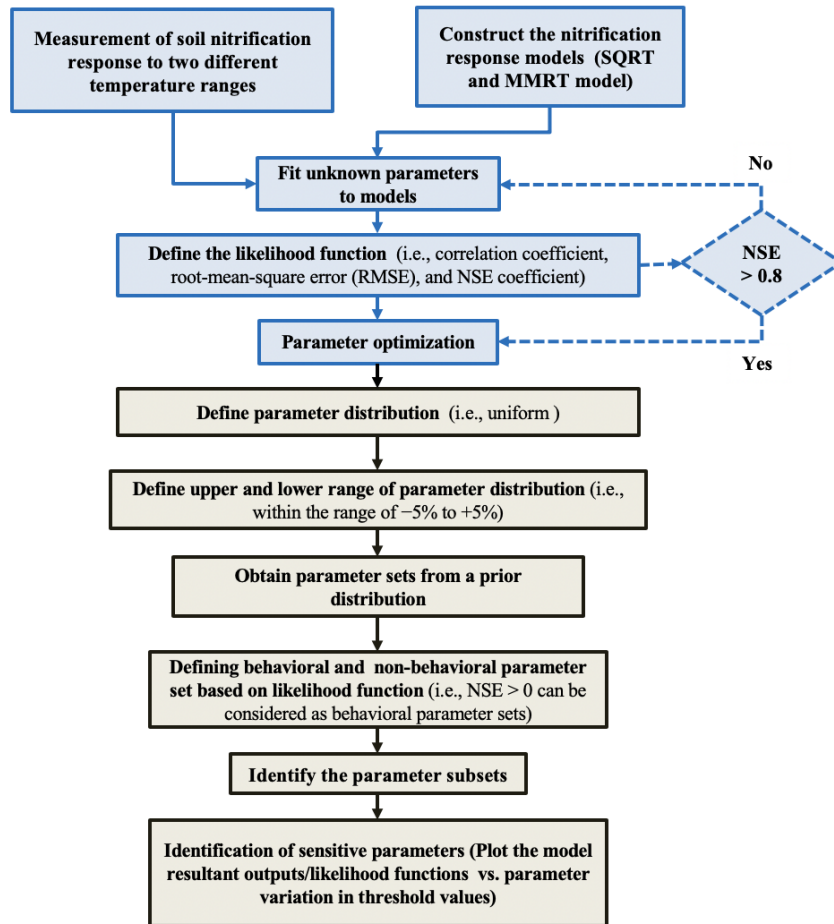

**Figure S2.** A step-by-step procedure for global sensitivity analysis which was used in this study.

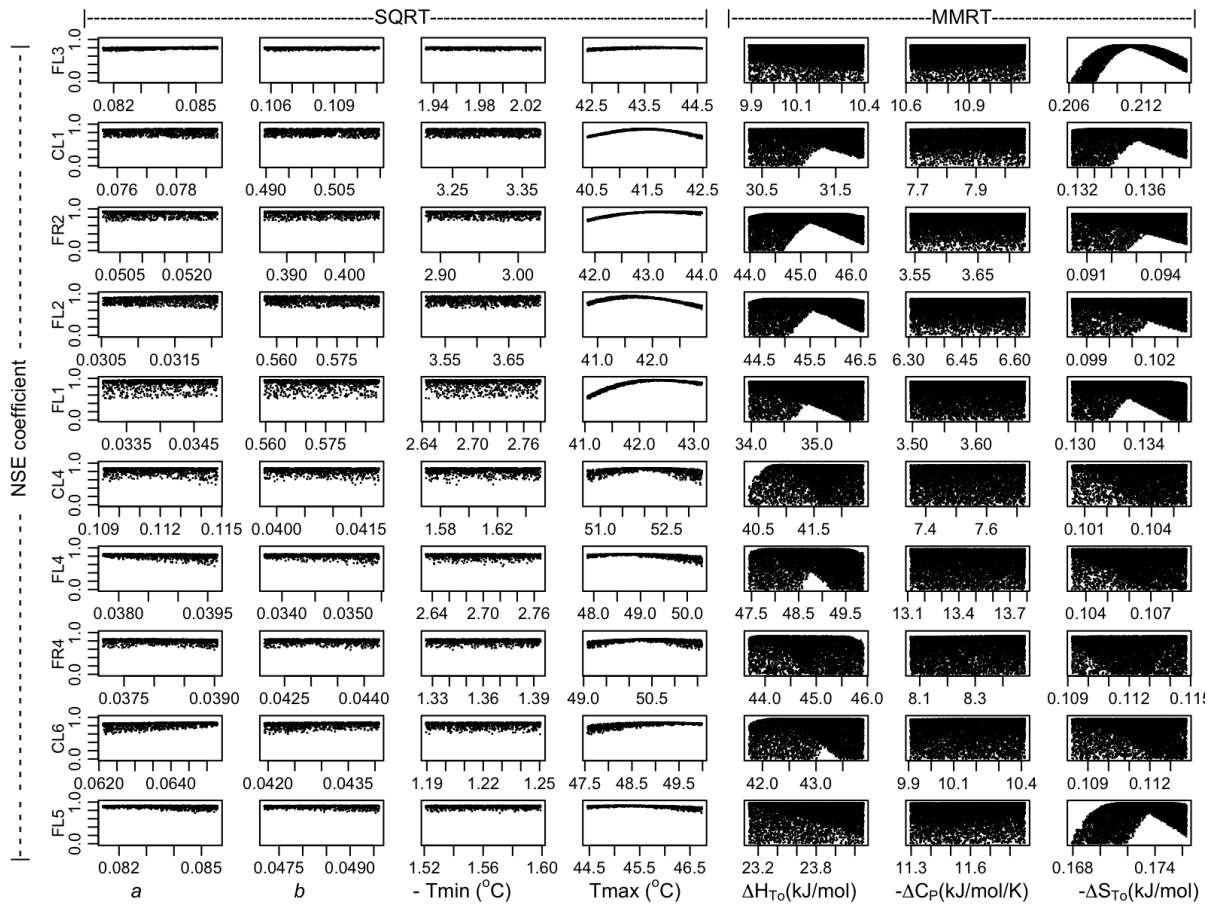

**Figure S3.** Scatter plot of parameter sensitivity analysis for square root growth model (SQRT) and macromolecular rate theory model (MMRT). FR, FL, and CL represent soil samples from forest land, fallow land, and cropland, respectively. From top, rows 1-5 indicate parameter sensitivity for soils incubated between 4°C and 40°C, rows 6-10 indicate parameter sensitivity for soils incubated between 20°C and 45°C.

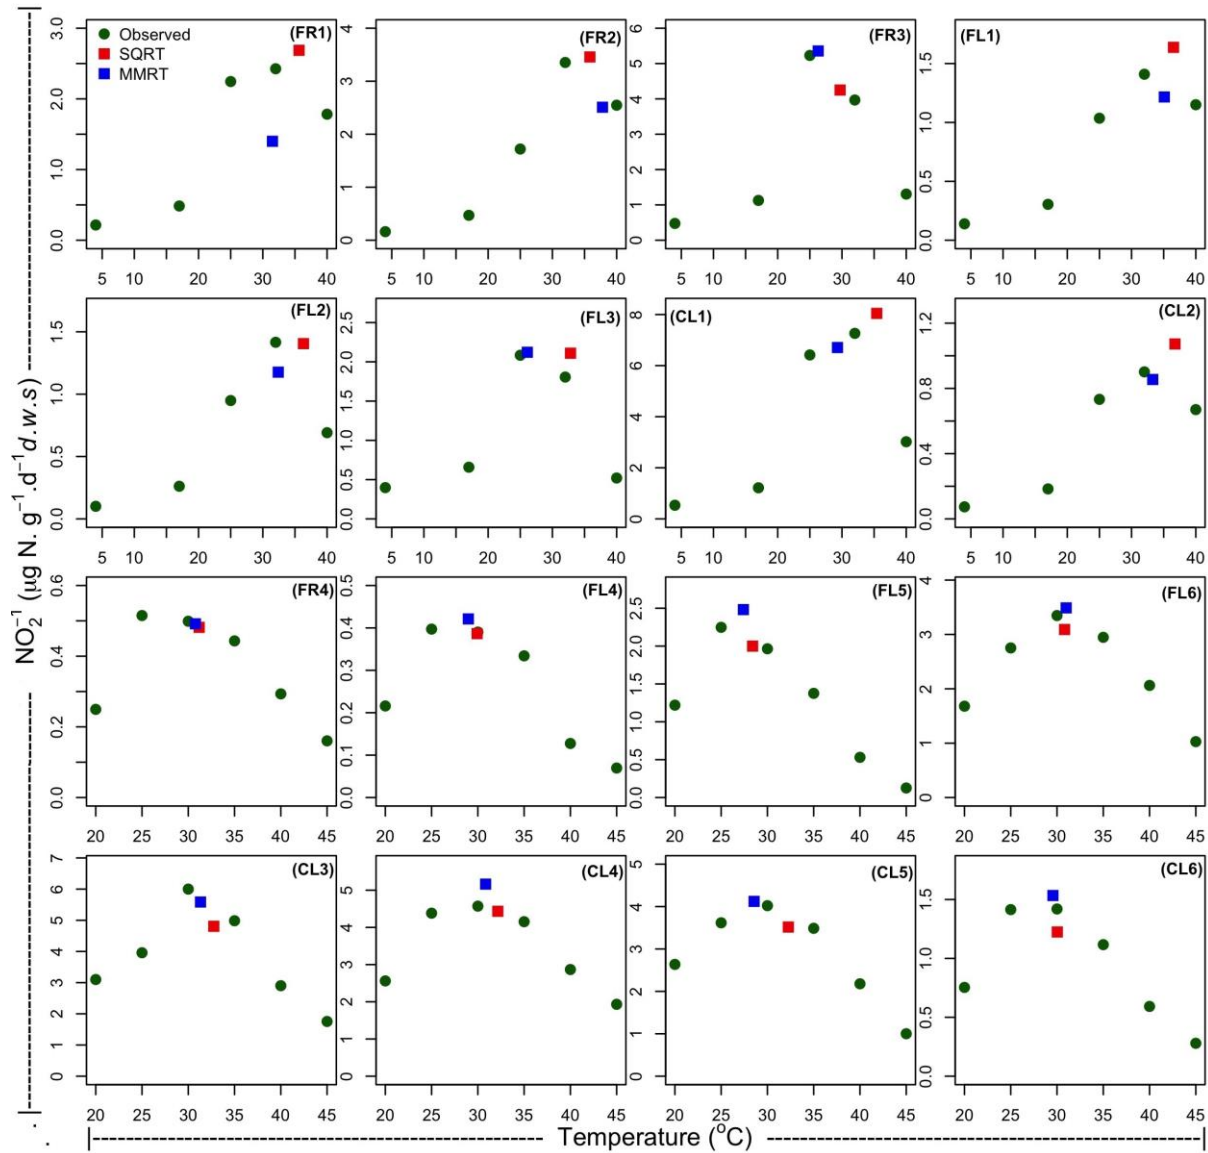

**Figure S4.** Variation in  $T_{opt}$  and associated nitrification, estimated by SQRT and MMRT model (red and blue points, respectively) and observed nitrification (dark green points) among soils at different temperature ranges. FR, FL, and CL represent soil samples from forest land, fallow land, and cropland, respectively.
